# Supplementary material for: Metastatic Salivary Gland Tumors: A Single-Center Study Demonstrating the Feasibility and Potential Clinical Benefit of Molecular-Profiling-Guided Therapy
Source: PubMed Central journal article supplement (PMC4584046; doi:10.1155/2015/614845), 2015-09-13
Supplement: 614845.f1.pdf [file 614845.f1.pdf]

## Supplementary Tables

**Supplementary Table 1:** Thresholds used for immunohistochemistry analyses

| <b>Marker</b>                                   | <b>Threshold (marker intensity/percentage)</b> |
|-------------------------------------------------|------------------------------------------------|
| Androgen Receptor (AR)                          | = 0+ or <10% or ≥1+ and ≥10%                   |
| c-KIT (CD117)                                   | =0+ and =100% or ≥2+ and ≥30%                  |
| cMET                                            | <50% or <2+ or ≥2+ and ≥50%                    |
| Estrogen Receptor (ER)                          | =0+ or <10% or ≥1+ and ≥10%                    |
| Progesterone Receptor (PR)                      | =0+ or <10% or ≥1+ and ≥10%                    |
| Epidermal Growth Factor Receptor (EGFR)         | 2+ and ≥10%                                    |
| Human Epidermal Growth Factor Receptor 2 (HER2) | ≤1+ or =2+ and ≤10% or ≥3+ and >10%            |
| O(6)-methylguanine-methyltransferase (MGMT)     | =0+ or ≤35% or ≥1+ and >35%                    |
| P-Glycoprotein (PGP)                            | =0+ or <10% or ≥1+ and ≥10%                    |
| Phosphatase and Tensin Homolog (PTEN)           | =0+ or ≤50% or ≥1+ and >50%                    |
| Ribonucleotide Reductase M1 (RRM1)              | =0+ or <50% or <2+ or ≥2+ and ≥50%             |
| SPARC (Osteonectin)                             | <30% or <2+ or ≥2+ and ≥30%                    |
| Transducin-Like Enhancer of Split 3 (TLE3)      | <30% or <2+ or ≥2+ and ≥30%                    |
| Topoisomerase 2 Alpha (TOPO2A)                  | =0+ or <10% or ≥1+ and ≥10%                    |
| Topoisomerase 1 (TOPO1)                         | =0+ or <30% or <2+ or ≥2+ and ≥30%             |
| Thymidylate Synthase (TS)                       | =0+ or ≤3+ and <10% or ≥1+ and ≥10%            |
| Tubulin β-3 Chain (TUBB3)                       | <30% or <2+ or ≥2+ and ≥30%                    |

**Supplementary Table 2: Key MP-findings for 14 cases of metastatic salivary gland ACC.**

| Patient No.                                                                             | IHC (key targets) |                   |                   |                    |                   |                   |                   |                   | FISH                                        | Microarray <sup>a</sup>                  | Sequencing                                           |
|-----------------------------------------------------------------------------------------|-------------------|-------------------|-------------------|--------------------|-------------------|-------------------|-------------------|-------------------|---------------------------------------------|------------------------------------------|------------------------------------------------------|
|                                                                                         | TS                | ERCC1             | TOPO1             | SPARC <sup>b</sup> | MGMT              | TOP2A             | ER/PgR            | AR                | Targets successfully measured by FISH       | Number of significant targets identified | Mutations identified by sequencing                   |
| 1                                                                                       | Neg               | High              | Low               | Low                | Int.              | Low               | Neg               | Pos               | Analysis failed                             | 3                                        | Analysis not performed                               |
| 2                                                                                       | Neg               | Low               | Low               | NA                 | Low               | Low               | Pos               | Neg               | Analysis not performed                      | Analysis not performed                   | Analysis not performed                               |
| 3 <sup>c</sup>                                                                          | Low               | High              | Low               | High               | High              | NA                | Neg               | Neg               | TOP2A, neg; cMET, neg                       | Analysis not performed                   | Analysis failed                                      |
| 4                                                                                       | Low               | Low               | Low               | Low                | High              | Low               | Neg               | Pos               | Analysis failed                             | Analysis failed                          | Analysis not performed                               |
| 5                                                                                       | Low               | Low               | High              | Low                | High              | Low               | Neg               | Neg               | Analysis failed                             | 10                                       | Analysis not performed                               |
| 6                                                                                       | Low               | Low               | Low               | High               | Int.              | Low               | Neg               | Neg               | EGFR, neg; HER2, neg; ALK, no rearrangement | 9                                        | <b>BRAF: w.t; EGFR and PIK3CA sequencing: failed</b> |
| 7                                                                                       | Low               | High              | High              | Low                | High              | Low               | Neg               | Neg               | Analysis not performed                      | Analysis failed                          | Analysis not performed                               |
| 8 <sup>e</sup>                                                                          | Neg               | NA                | High              | High               | High              | Low               | Neg               | Neg               | Analysis not performed                      | Analysis not performed                   | Analysis failed                                      |
| 9                                                                                       | Low               | Low               | Low               | Low                | Low               | High              | Pos               | Int.              | EGFR, neg; ALK, no rearrangement            | 7                                        | <b>BRAF, C-KIT, EGFR, KRAS: all w.t.</b>             |
| 10                                                                                      | High              | Low               | Low               | Low                | High              | High              | Neg               | Neg               | EGFR, neg; HER2, neg; ALK, no rearrangement | 8                                        | <b>BRAF, EGFR, PIK3CA: all w.t.</b>                  |
| 11                                                                                      | NA                | NA                | NA                | High               | Low               | NA                | Neg               | Neg               | Analysis not performed                      | Analysis not performed                   | Analysis not performed <sup>d</sup>                  |
| 12                                                                                      | Neg               | High              | High              | Low                | Int.              | Low               | Neg               | Neg               | Analysis not performed                      | 2                                        | Analysis not performed                               |
| 13                                                                                      | Int.              | Int.              | High              | NA                 | High              | Low               | Neg <sup>e</sup>  | NA                | Analysis not performed                      | Analysis not performed                   | <b>C-KIT: w.t; EGFR sequencing: failed</b>           |
| 14                                                                                      | NA                | High              | High              | NA                 | High              | NA                | Neg               | Neg               | EGFR, neg; HER2, neg                        | Analysis failed                          | Analysis not performed                               |
| <b>No. of patients with actionable<sup>f</sup> target/no. of evaluable patients (%)</b> | <b>9/12 (75%)</b> | <b>6/12 (50%)</b> | <b>6/13 (46%)</b> | <b>4/11 (36%)</b>  | <b>3/14 (21%)</b> | <b>2/11 (18%)</b> | <b>2/14 (14%)</b> | <b>2/14 (14%)</b> | NA                                          | NA                                       | NA                                                   |

Grey cells with bold font represent findings associated with potential clinical benefit for a particular treatment regimen. None of the 12 patients whose HER2 levels were tested by IHC was found to be HER2 positive.

ACC, adenoid cystic carcinomas; AR, androgen receptor; ASNS, asparagine synthetase; CMI, Caris Molecular Intelligence; DCK, deoxycytidine kinase; EGFR, epidermal growth factor receptor; EPHA2, erythropoietin-producing hepatocellular receptor tyrosine kinase class A2; ER, estrogen receptor; ERCC, excision repair cross-complementation; ESR1, estrogen receptor 1; FISH, fluorescence in situ hybridization; HER2, human epidermal growth factor receptor 2; IHC, immunohistochemistry; Int, intermediate; MGMT, O-6-methylguanine-DNA methyltransferase; MP, molecular profiling; NA, not available; Neg, negative; 1; PDGFRA, platelet-derived growth factor receptor alpha; PGP, P-glycoprotein; PgR, progesterone receptor; Pos, positive; RRM2B, ribonucleotide reductase M2 B; SPARC, secreted protein acidic and rich in cysteine; SSTR2, somatostatin receptor 2; TOPO1/TOP1, topoisomerase I; TOP2A/B, topoisomerase II alpha/beta; TS, thymidylate synthase; TUBB3, tubulin, beta 3 class III; VDR, vitamin D receptor; VEGFR2, vascular endothelial growth factor receptor; w.t., wild type.

<sup>a</sup>Microarray analysis evaluated 80 targets.

<sup>b</sup>The IHC analysis was performed twice (using monoclonal and polyclonal anti SPARC antibodies).

<sup>c</sup>These patients had negative/low PGP and TUBB3 by IHC

<sup>d</sup>This patient underwent 2 sets of MP, CMI and sequencing (not through CMI) and was found to have AKT1 mutation

<sup>e</sup>This patient had PR negative tumor, ER levels were not measured.

<sup>f</sup>An actionable target is defined as an MP finding associated with a potential clinical benefit for a particular treatment regimen.
